# Supplementary material for: The thermal isomerization of the GFP chromophore: A computational study
Source: Royal Society of Chemistry journal article supplement (doi:10.1039/c0cp00181c), 2010-01-01
Supplement: c0cp00181c.pdf [file c0cp00181c.pdf]

Electronic Supplementary Information  
for  
The thermal isomerization of the GFP chromophore: a  
computational study

Dongqi Wang, Thomas Merz, Wilfred F. van Gunsteren\*

*Laboratory of Physical Chemistry, Swiss Federal Institute of Technology,  
ETH, CH-8093 Zürich, Switzerland*

May 17, 2010

## Contents

|   |                                                                                                |    |
|---|------------------------------------------------------------------------------------------------|----|
| 1 | Full citation of the Gaussian09 program                                                        | S2 |
| 2 | Energy profile for the unassisted thermal isomerization in the gas phase                       | S3 |
| 3 | TS1 of the reaction assisted by <i>n</i> -propylamine in the gas phase, in benzene and in MeCN | S4 |
| 4 | Coordinates (Å) and energies (kcal/mol) of fully optimized stationary points                   | S5 |

# 1 Full citation of the Gaussian09 program

Gaussian 09, Revision A.02, M. J. Frisch, G. W. Trucks, H. B. Schlegel, G. E. Scuseria, M. A. Robb, J. R. Cheeseman, G. Scalmani, V. Barone, B. Mennucci, G. A. Petersson, H. Nakatsuji, M. Caricato, X. Li, H. P. Hratchian, A. F. Izmaylov, J. Bloino, G. Zheng, J. L. Sonnenberg, M. Hada, M. Ehara, K. Toyota, R. Fukuda, J. Hasegawa, M. Ishida, T. Nakajima, Y. Honda, O. Kitao, H. Nakai, T. Vreven, J. A. Montgomery, Jr., J. E. Peralta, F. Ogliaro, M. Bearpark, J. J. Heyd, E. Brothers, K. N. Kudin, V. N. Staroverov, R. Kobayashi, J. Normand, K. Raghavachari, A. Rendell, J. C. Burant, S. S. Iyengar, J. Tomasi, M. Cossi, N. Rega, J. M. Millam, M. Klene, J. E. Knox, J. B. Cross, V. Bakken, C. Adamo, J. Jaramillo, R. Gomperts, R. E. Stratmann, O. Yazyev, A. J. Austin, R. Cammi, C. Pomelli, J. W. Ochterski, R. L. Martin, K. Morokuma, V. G. Zakrzewski, G. A. Voth, P. Salvador, J. J. Dannenberg, S. Dapprich, A. D. Daniels, O. Farkas, J. B. Foresman, J. V. Ortiz, J. Cioslowski, and D. J. Fox, Gaussian, Inc., Wallingford CT, 2009.

## 2 Energy profile for the unassisted thermal isomerization in the gas phase

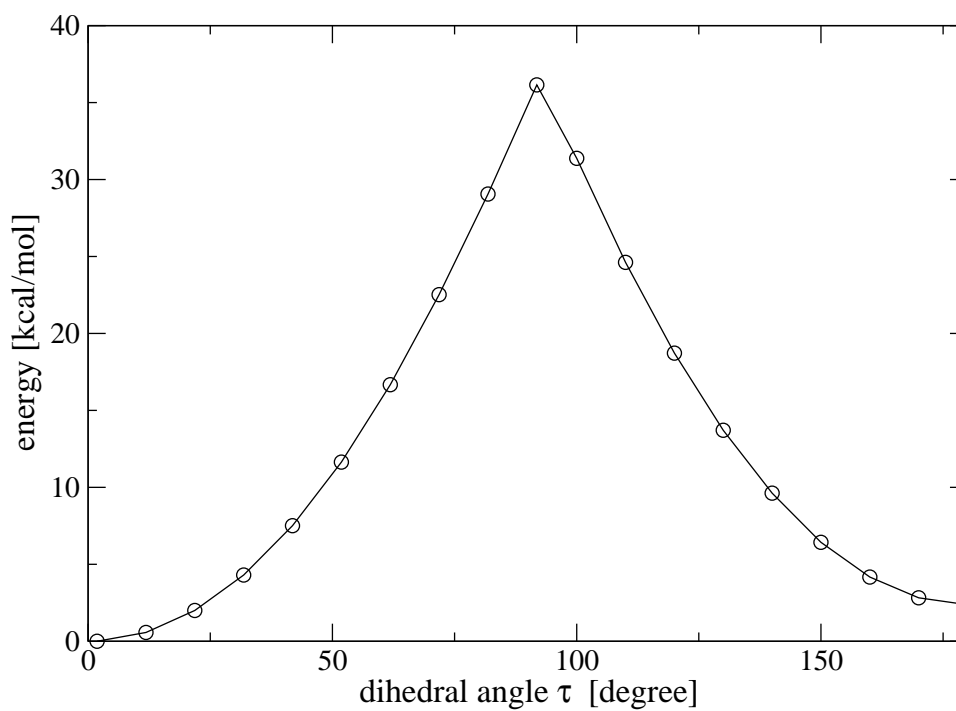

Figure S1: The potential energy profile of the unassisted thermal isomerization of HOBDI in the gas phase as a function of the dihedral-angle  $N^1 - C^1 - C^2 - C^3$  ( $\tau$  in degree). The energy maximum corresponds to a  $\tau$  value of  $92^\circ$  and an energy of 36.2 kcal/mol.

### 3 TS1 of the reaction assisted by *n*-propylamine in the gas phase, in benzene and in MeCN

In our calculations, the isomerization assisted by *n*-propylamine in the gas phase, in benzene and in MeCN has barriers of 21.5, 3.6, 13.6 and 19.1, 3.7, 11.1 and 17.8, 3.0, 2.6 kcal/mol for the three reaction steps, see Fig. 13. This shows the solvent effect: with increase of the polarity of the environment, the barriers to the addition/elimination of *n*-propylamine decrease.

In view of the change of geometry of HOBDI during the isomerization, this is reasonable since there is less pyramidalization of C<sup>2</sup> in state TS1 (see Fig. S2) when the polarity of the environment becomes stronger. Accordingly, the hydrogen bond interaction between O<sup>1</sup> and the protons of *n*-propylamine becomes weaker due to the stabilization of the charged groups (O<sup>1</sup> and NH<sub>2</sub>) in a polar environment. Actually, in our calculations we observe the proton transfer between O<sup>1</sup> and *n*-propylamine in the gas phase and in benzene, but not in MeCN.

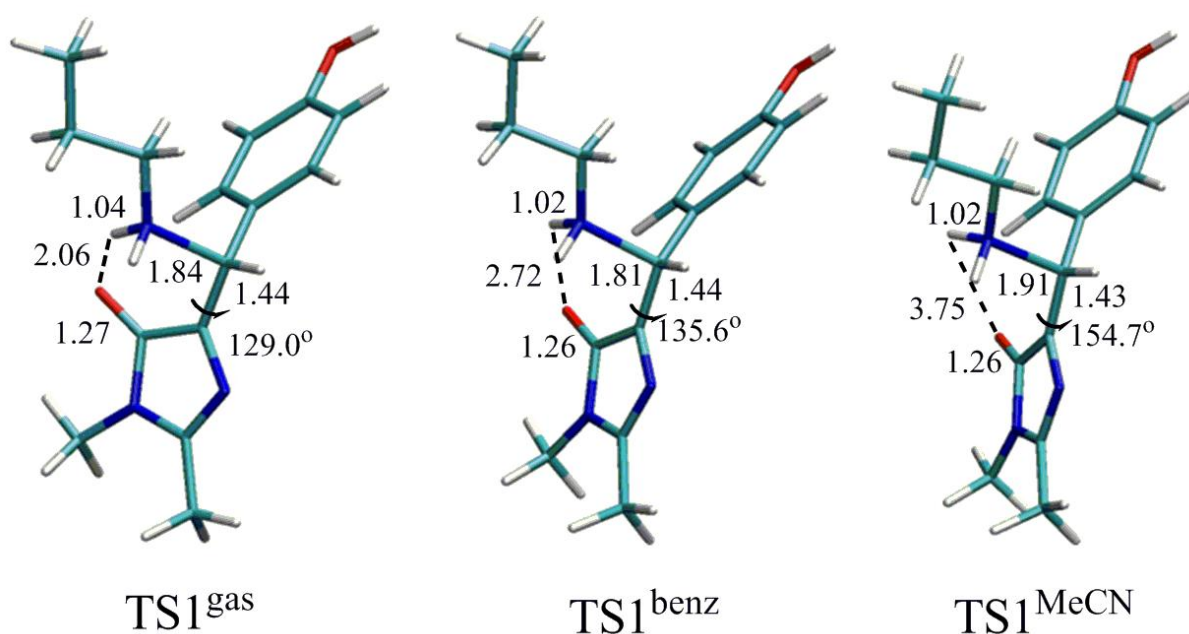

Figure S2: The optimized transition state for the adduct formation of E-HOBDI and *n*-propylamine in the gas phase (TS1<sup>gas</sup>), in benzene (TS1<sup>benz</sup>) and in acetonitrile (TS1<sup>MeCN</sup>). The dihedral-angle values are given for N<sup>1</sup> – C<sup>1</sup> – C<sup>2</sup> – C<sup>3</sup>. Some bond lengths or atom-atom distances are given in Å.

## 4 Coordinates (Å) and energies (kcal/mol) of fully optimized stationary points

E-HOBDI

| Center Number | Atomic Number | Atomic Type | Coordinates (Angstroms) |           |           |
|---------------|---------------|-------------|-------------------------|-----------|-----------|
|               |               |             | X                       | Y         | Z         |
| 1             | 7             | 0           | 2.276153                | -1.486321 | -0.000030 |
| 2             | 6             | 0           | 3.321525                | -0.719847 | -0.000018 |
| 3             | 6             | 0           | 4.732189                | -1.204089 | -0.000029 |
| 4             | 1             | 0           | 4.727420                | -2.294252 | -0.000035 |
| 5             | 1             | 0           | 5.276798                | -0.849986 | 0.883034  |
| 6             | 1             | 0           | 5.276787                | -0.849978 | -0.883096 |
| 7             | 7             | 0           | 3.015576                | 0.641962  | 0.000006  |
| 8             | 6             | 0           | 3.924007                | 1.770613  | 0.000031  |
| 9             | 1             | 0           | 4.559955                | 1.772132  | 0.891210  |
| 10            | 1             | 0           | 4.560051                | 1.772087  | -0.891079 |
| 11            | 1             | 0           | 3.306922                | 2.670913  | -0.000023 |
| 12            | 6             | 0           | 1.624047                | 0.778627  | 0.000011  |
| 13            | 8             | 0           | 1.040657                | 1.859531  | 0.000030  |
| 14            | 6             | 0           | 1.151245                | -0.634598 | -0.000014 |
| 15            | 6             | 0           | -0.100005               | -1.178827 | -0.000021 |
| 16            | 1             | 0           | -0.064702               | -2.267455 | -0.000040 |
| 17            | 6             | 0           | -1.441222               | -0.631711 | -0.000009 |
| 18            | 6             | 0           | -2.513470               | -1.555913 | -0.000022 |
| 19            | 1             | 0           | -2.291117               | -2.619541 | -0.000039 |
| 20            | 6             | 0           | -3.836297               | -1.145918 | -0.000012 |
| 21            | 1             | 0           | -4.651953               | -1.860798 | -0.000022 |
| 22            | 6             | 0           | -4.130677               | 0.223762  | 0.000010  |
| 23            | 8             | 0           | -5.443520               | 0.584147  | 0.000018  |
| 24            | 1             | 0           | -5.507821               | 1.548709  | 0.000034  |
| 25            | 6             | 0           | -3.088442               | 1.160654  | 0.000022  |
| 26            | 1             | 0           | -3.319056               | 2.224264  | 0.000039  |
| 27            | 6             | 0           | -1.764317               | 0.743947  | 0.000013  |
| 28            | 1             | 0           | -0.963978               | 1.474796  | 0.000022  |

|                                              |             |
|----------------------------------------------|-------------|
| Zero-point correction=                       | 0.222194    |
| Thermal correction to Energy=                | 0.236622    |
| Thermal correction to Enthalpy=              | 0.237566    |
| Thermal correction to Gibbs Free Energy=     | 0.180497    |
| Sum of electronic and zero-point Energies=   | -724.261626 |
| Sum of electronic and thermal Energies=      | -724.247198 |
| Sum of electronic and thermal Enthalpies=    | -724.246254 |
| Sum of electronic and thermal Free Energies= | -724.303323 |

in DMSO:

DMSO:

| Center<br>Number | Atomic<br>Number | Atomic<br>Type | Coordinates (Angstroms) |           |           |
|------------------|------------------|----------------|-------------------------|-----------|-----------|
|                  |                  |                | X                       | Y         | Z         |
| 1                | 8                | 0              | -0.000011               | 1.507980  | 0.386264  |
| 2                | 16               | 0              | -0.000001               | 0.241894  | -0.439291 |
| 3                | 6                | 0              | 1.363508                | -0.821441 | 0.180479  |
| 4                | 6                | 0              | -1.363497               | -0.821458 | 0.180478  |
| 5                | 1                | 0              | -1.331797               | -1.794722 | -0.316648 |
| 6                | 1                | 0              | -1.275488               | -0.931494 | 1.264337  |
| 7                | 1                | 0              | -2.298148               | -0.312184 | -0.061283 |
| 8                | 1                | 0              | 1.331824                | -1.794700 | -0.316658 |
| 9                | 1                | 0              | 2.298153                | -0.312151 | -0.061273 |
| 10               | 1                | 0              | 1.275497                | -0.931491 | 1.264336  |

Zero-point correction= 0.079544  
Thermal correction to Energy= 0.085206  
Thermal correction to Enthalpy= 0.086151  
Thermal correction to Gibbs Free Energy= 0.051207  
Sum of electronic and zero-point Energies= -553.115975  
Sum of electronic and thermal Energies= -553.110312  
Sum of electronic and thermal Enthalpies= -553.109368  
Sum of electronic and thermal Free Energies= -553.144311

TS:

| Center<br>Number | Atomic<br>Number | Atomic<br>Type | Coordinates (Angstroms) |           |           |
|------------------|------------------|----------------|-------------------------|-----------|-----------|
|                  |                  |                | X                       | Y         | Z         |
| 1                | 6                | 0              | -1.895213               | -0.909382 | 0.745734  |
| 2                | 6                | 0              | -1.648046               | -0.079289 | -0.353127 |
| 3                | 6                | 0              | -2.740422               | 0.410048  | -1.081104 |
| 4                | 6                | 0              | -4.046923               | 0.085193  | -0.734124 |
| 5                | 6                | 0              | -4.277134               | -0.744392 | 0.368931  |
| 6                | 6                | 0              | -3.196845               | -1.240845 | 1.108302  |
| 7                | 6                | 0              | -0.245584               | 0.329789  | -0.720115 |
| 8                | 8                | 0              | -0.022819               | 1.584290  | 0.118006  |
| 9                | 16               | 0              | 1.297658                | 2.497729  | -0.243148 |
| 10               | 6                | 0              | 1.709499                | 3.148764  | 1.396700  |
| 11               | 8                | 0              | -5.575327               | -1.039511 | 0.674374  |
| 12               | 6                | 0              | 0.838033                | -0.650543 | -0.438728 |
| 13               | 7                | 0              | 0.736905                | -1.991998 | -0.780897 |
| 14               | 6                | 0              | 1.879731                | -2.536732 | -0.432732 |
| 15               | 7                | 0              | 2.739047                | -1.602357 | 0.124820  |
| 16               | 6                | 0              | 2.079288                | -0.365676 | 0.124574  |
| 17               | 8                | 0              | 2.616587                | 0.723141  | 0.568180  |
| 18               | 6                | 0              | 4.075876                | -1.796847 | 0.638092  |
| 19               | 6                | 0              | 2.237906                | -3.976638 | -0.595603 |

|    |   |   |           |           |           |
|----|---|---|-----------|-----------|-----------|
| 20 | 6 | 0 | 0.315122  | 3.956419  | -0.812912 |
| 21 | 1 | 0 | -0.144367 | 3.679326  | -1.763489 |
| 22 | 1 | 0 | 0.998463  | 4.795218  | -0.974296 |
| 23 | 1 | 0 | -0.458430 | 4.217156  | -0.088393 |
| 24 | 1 | 0 | 2.282283  | 2.362861  | 1.882150  |
| 25 | 1 | 0 | 0.774144  | 3.363247  | 1.916362  |
| 26 | 1 | 0 | 2.292848  | 4.061945  | 1.256290  |
| 27 | 1 | 0 | 4.435657  | -0.819181 | 0.965612  |
| 28 | 1 | 0 | 4.750958  | -2.186391 | -0.132449 |
| 29 | 1 | 0 | 4.088398  | -2.485577 | 1.491148  |
| 30 | 1 | 0 | 3.118231  | -4.121542 | -1.236528 |
| 31 | 1 | 0 | 2.454922  | -4.467902 | 0.362783  |
| 32 | 1 | 0 | 1.391519  | -4.488115 | -1.057631 |
| 33 | 1 | 0 | -2.563806 | 1.050721  | -1.942094 |
| 34 | 1 | 0 | -4.894658 | 0.453843  | -1.301767 |
| 35 | 1 | 0 | -5.591139 | -1.634273 | 1.435832  |
| 36 | 1 | 0 | -3.377502 | -1.892678 | 1.960838  |
| 37 | 1 | 0 | -1.053575 | -1.307306 | 1.301134  |
| 38 | 1 | 0 | -0.257391 | 0.692899  | -1.760405 |

```

-----
Zero-point correction=                0.303681
Thermal correction to Energy=         0.323716
Thermal correction to Enthalpy=       0.324660
Thermal correction to Gibbs Free Energy= 0.255358
Sum of electronic and zero-point Energies= -1277.320558
Sum of electronic and thermal Energies= -1277.300523
Sum of electronic and thermal Enthalpies= -1277.299579
Sum of electronic and thermal Free Energies= -1277.368881

```

in methanol:

Methanol:

```

-----
Center      Atomic      Atomic      Coordinates (Angstroms)
Number      Number      Type        X           Y           Z
-----
   1         8           0        -0.749296   0.122042  -0.000017
   2         6           0         0.661644  -0.019433  -0.000014
   3         1           0         1.038088  -0.543214  -0.891726
   4         1           0         1.082064   0.989509  -0.000147
   5         1           0         1.038168  -0.542773   0.891935
   6         1           0        -1.133819  -0.763254   0.000156
-----

```

```

-----
Zero-point correction=                0.051404
Thermal correction to Energy=         0.054707
Thermal correction to Enthalpy=       0.055651
Thermal correction to Gibbs Free Energy= 0.028675
Sum of electronic and zero-point Energies= -115.672560
Sum of electronic and thermal Energies= -115.669257

```

Sum of electronic and thermal Enthalpies= -115.668313  
 Sum of electronic and thermal Free Energies= -115.695288

TS1:

| Center<br>Number | Atomic<br>Number | Atomic<br>Type | Coordinates (Angstroms) |           |           |
|------------------|------------------|----------------|-------------------------|-----------|-----------|
|                  |                  |                | X                       | Y         | Z         |
| 1                | 7                | 0              | -2.041267               | -0.255423 | -1.555373 |
| 2                | 6                | 0              | -3.039554               | -0.746095 | -0.863197 |
| 3                | 6                | 0              | -4.275103               | -1.353473 | -1.438114 |
| 4                | 1                | 0              | -4.222613               | -1.272265 | -2.524797 |
| 5                | 1                | 0              | -5.186025               | -0.846062 | -1.095780 |
| 6                | 1                | 0              | -4.376425               | -2.414299 | -1.175223 |
| 7                | 7                | 0              | -2.819144               | -0.662582 | 0.516268  |
| 8                | 6                | 0              | -3.729317               | -0.979322 | 1.598419  |
| 9                | 1                | 0              | -4.688522               | -0.467424 | 1.471166  |
| 10               | 1                | 0              | -3.912319               | -2.056966 | 1.667990  |
| 11               | 1                | 0              | -3.263265               | -0.635755 | 2.523901  |
| 12               | 6                | 0              | -1.575121               | -0.081434 | 0.689047  |
| 13               | 8                | 0              | -1.091150               | 0.378918  | 1.793286  |
| 14               | 6                | 0              | -1.084279               | 0.110300  | -0.612118 |
| 15               | 6                | 0              | 0.153283                | 0.810247  | -0.831443 |
| 16               | 1                | 0              | 0.171355                | 1.437640  | -1.724428 |
| 17               | 6                | 0              | 1.477348                | 0.240732  | -0.497746 |
| 18               | 6                | 0              | 2.646759                | 0.937306  | -0.854538 |
| 19               | 1                | 0              | 2.560313                | 1.898567  | -1.353756 |
| 20               | 6                | 0              | 3.905356                | 0.428367  | -0.573863 |
| 21               | 1                | 0              | 4.808431                | 0.961805  | -0.850037 |
| 22               | 6                | 0              | 4.019609                | -0.806410 | 0.079779  |
| 23               | 8                | 0              | 5.277035                | -1.268420 | 0.327748  |
| 24               | 1                | 0              | 5.219591                | -2.118705 | 0.783761  |
| 25               | 6                | 0              | 2.868151                | -1.517426 | 0.437621  |
| 26               | 1                | 0              | 2.957349                | -2.481366 | 0.933890  |
| 27               | 6                | 0              | 1.611873                | -0.996654 | 0.146913  |
| 28               | 1                | 0              | 0.721080                | -1.557721 | 0.405269  |
| 29               | 8                | 0              | 0.104514                | 2.089800  | 0.499005  |
| 30               | 6                | 0              | -0.875873               | 3.103725  | 0.275830  |
| 31               | 1                | 0              | -1.179040               | 3.524088  | 1.239922  |
| 32               | 1                | 0              | -0.435883               | 3.891035  | -0.342282 |
| 33               | 1                | 0              | -1.761108               | 2.692496  | -0.225448 |
| 34               | 1                | 0              | -0.332020               | 1.369409  | 1.239731  |

Zero-point correction= 0.272700  
 Thermal correction to Energy= 0.290098  
 Thermal correction to Enthalpy= 0.291042  
 Thermal correction to Gibbs Free Energy= 0.227158  
 Sum of electronic and zero-point Energies= -839.890579  
 Sum of electronic and thermal Energies= -839.873181



Sum of electronic and thermal Enthalpies= -839.872237  
 Sum of electronic and thermal Free Energies= -839.936121

IM1:

| Center<br>Number | Atomic<br>Number | Atomic<br>Type | Coordinates (Angstroms) |           |           |
|------------------|------------------|----------------|-------------------------|-----------|-----------|
|                  |                  |                | X                       | Y         | Z         |
| 1                | 7                | 0              | -1.632137               | -0.792079 | -1.251819 |
| 2                | 6                | 0              | -2.677164               | -1.230325 | -0.581420 |
| 3                | 6                | 0              | -3.592302               | -2.327935 | -1.010508 |
| 4                | 1                | 0              | -3.242515               | -2.704843 | -1.972674 |
| 5                | 1                | 0              | -4.627927               | -1.985432 | -1.131639 |
| 6                | 1                | 0              | -3.605958               | -3.162363 | -0.297884 |
| 7                | 7                | 0              | -2.843462               | -0.533183 | 0.604845  |
| 8                | 6                | 0              | -3.884567               | -0.697443 | 1.603801  |
| 9                | 1                | 0              | -4.875410               | -0.559864 | 1.160238  |
| 10               | 1                | 0              | -3.836685               | -1.690478 | 2.061715  |
| 11               | 1                | 0              | -3.736923               | 0.054885  | 2.378862  |
| 12               | 6                | 0              | -1.818757               | 0.383493  | 0.656371  |
| 13               | 8                | 0              | -1.708208               | 1.238226  | 1.699339  |
| 14               | 6                | 0              | -1.079701               | 0.221498  | -0.489128 |
| 15               | 6                | 0              | 0.162803                | 0.994232  | -0.836223 |
| 16               | 1                | 0              | 0.195102                | 1.142672  | -1.927373 |
| 17               | 6                | 0              | 1.466589                | 0.329913  | -0.400446 |
| 18               | 6                | 0              | 2.553213                | 1.085017  | 0.058165  |
| 19               | 1                | 0              | 2.448867                | 2.159983  | 0.149566  |
| 20               | 6                | 0              | 3.755107                | 0.476115  | 0.410553  |
| 21               | 1                | 0              | 4.594737                | 1.058553  | 0.775613  |
| 22               | 6                | 0              | 3.892667                | -0.909770 | 0.294709  |
| 23               | 8                | 0              | 5.094459                | -1.460525 | 0.650556  |
| 24               | 1                | 0              | 5.050599                | -2.416584 | 0.518712  |
| 25               | 6                | 0              | 2.818817                | -1.675035 | -0.170687 |
| 26               | 1                | 0              | 2.919967                | -2.754848 | -0.262957 |
| 27               | 6                | 0              | 1.616733                | -1.056857 | -0.510244 |
| 28               | 1                | 0              | 0.785608                | -1.656158 | -0.868626 |
| 29               | 8                | 0              | 0.090482                | 2.292770  | -0.198769 |
| 30               | 6                | 0              | -0.696354               | 3.230255  | -0.924687 |
| 31               | 1                | 0              | -0.707516               | 4.154964  | -0.343117 |
| 32               | 1                | 0              | -0.254770               | 3.431554  | -1.909862 |
| 33               | 1                | 0              | -1.725427               | 2.875354  | -1.064252 |
| 34               | 1                | 0              | -0.968923               | 1.826734  | 1.451960  |

Zero-point correction= 0.277947  
 Thermal correction to Energy= 0.295785  
 Thermal correction to Enthalpy= 0.296729  
 Thermal correction to Gibbs Free Energy= 0.230853  
 Sum of electronic and zero-point Energies= -839.922793  
 Sum of electronic and thermal Energies= -839.904955

Sum of electronic and thermal Enthalpies= -839.904011  
 Sum of electronic and thermal Free Energies= -839.969886

TS2:

| Center<br>Number | Atomic<br>Number | Atomic<br>Type | Coordinates (Angstroms) |           |           |
|------------------|------------------|----------------|-------------------------|-----------|-----------|
|                  |                  |                | X                       | Y         | Z         |
| 1                | 7                | 0              | -1.472477               | -1.006189 | -1.034122 |
| 2                | 6                | 0              | -2.589040               | -1.381740 | -0.447227 |
| 3                | 6                | 0              | -3.364656               | -2.618386 | -0.755856 |
| 4                | 1                | 0              | -2.846175               | -3.155051 | -1.551705 |
| 5                | 1                | 0              | -4.384275               | -2.398217 | -1.096957 |
| 6                | 1                | 0              | -3.447686               | -3.285584 | 0.111507  |
| 7                | 7                | 0              | -2.980559               | -0.468957 | 0.516900  |
| 8                | 6                | 0              | -4.152453               | -0.515495 | 1.372545  |
| 9                | 1                | 0              | -5.070713               | -0.539551 | 0.777449  |
| 10               | 1                | 0              | -4.129348               | -1.395834 | 2.022663  |
| 11               | 1                | 0              | -4.157902               | 0.380362  | 1.993665  |
| 12               | 6                | 0              | -2.027296               | 0.525899  | 0.515248  |
| 13               | 8                | 0              | -2.141031               | 1.580570  | 1.354493  |
| 14               | 6                | 0              | -1.103592               | 0.187614  | -0.441283 |
| 15               | 6                | 0              | 0.138003                | 0.956845  | -0.809154 |
| 16               | 1                | 0              | 0.168033                | 1.060035  | -1.903901 |
| 17               | 6                | 0              | 1.444816                | 0.300231  | -0.361081 |
| 18               | 6                | 0              | 2.370147                | 0.969783  | 0.445340  |
| 19               | 1                | 0              | 2.146912                | 1.975311  | 0.783299  |
| 20               | 6                | 0              | 3.565017                | 0.362038  | 0.827780  |
| 21               | 1                | 0              | 4.282479                | 0.879127  | 1.456599  |
| 22               | 6                | 0              | 3.851536                | -0.936395 | 0.401332  |
| 23               | 8                | 0              | 5.038688                | -1.490310 | 0.801074  |
| 24               | 1                | 0              | 5.099926                | -2.386151 | 0.444721  |
| 25               | 6                | 0              | 2.933185                | -1.618375 | -0.404582 |
| 26               | 1                | 0              | 3.149011                | -2.632337 | -0.736434 |
| 27               | 6                | 0              | 1.741476                | -1.002681 | -0.780036 |
| 28               | 1                | 0              | 1.021220                | -1.543346 | -1.386345 |
| 29               | 8                | 0              | 0.017323                | 2.274604  | -0.225433 |
| 30               | 6                | 0              | 0.060443                | 3.336906  | -1.167388 |
| 31               | 1                | 0              | -0.028024               | 4.268977  | -0.603762 |
| 32               | 1                | 0              | 1.011086                | 3.343464  | -1.715997 |
| 33               | 1                | 0              | -0.767352               | 3.274100  | -1.886746 |
| 34               | 1                | 0              | -1.401309               | 2.164346  | 1.097608  |

Zero-point correction= 0.277721  
 Thermal correction to Energy= 0.294818  
 Thermal correction to Enthalpy= 0.295763  
 Thermal correction to Gibbs Free Energy= 0.231776  
 Sum of electronic and zero-point Energies= -839.921177  
 Sum of electronic and thermal Energies= -839.904080

Sum of electronic and thermal Enthalpies= -839.903136  
 Sum of electronic and thermal Free Energies= -839.967122

IM2:

| Center<br>Number | Atomic<br>Number | Atomic<br>Type | Coordinates (Angstroms) |           |           |
|------------------|------------------|----------------|-------------------------|-----------|-----------|
|                  |                  |                | X                       | Y         | Z         |
| 1                | 7                | 0              | -1.315156               | -1.099654 | -0.867347 |
| 2                | 6                | 0              | -2.505189               | -1.461091 | -0.443128 |
| 3                | 6                | 0              | -3.147395               | -2.788520 | -0.671969 |
| 4                | 1                | 0              | -2.458467               | -3.402509 | -1.253744 |
| 5                | 1                | 0              | -4.089886               | -2.706283 | -1.228349 |
| 6                | 1                | 0              | -3.367512               | -3.313211 | 0.266550  |
| 7                | 7                | 0              | -3.119722               | -0.441249 | 0.265437  |
| 8                | 6                | 0              | -4.423251               | -0.451619 | 0.903725  |
| 9                | 1                | 0              | -5.211032               | -0.673002 | 0.177063  |
| 10               | 1                | 0              | -4.464337               | -1.195927 | 1.705779  |
| 11               | 1                | 0              | -4.604086               | 0.535353  | 1.329909  |
| 12               | 6                | 0              | -2.233552               | 0.613318  | 0.267150  |
| 13               | 8                | 0              | -2.562018               | 1.770801  | 0.885025  |
| 14               | 6                | 0              | -1.124402               | 0.198363  | -0.429667 |
| 15               | 6                | 0              | 0.111348                | 0.995130  | -0.741529 |
| 16               | 1                | 0              | 0.157254                | 1.205878  | -1.823666 |
| 17               | 6                | 0              | 1.406961                | 0.307243  | -0.344589 |
| 18               | 6                | 0              | 2.373584                | -0.022708 | -1.299122 |
| 19               | 1                | 0              | 2.190092                | 0.206668  | -2.345925 |
| 20               | 6                | 0              | 3.564239                | -0.650430 | -0.939168 |
| 21               | 1                | 0              | 4.312158                | -0.913028 | -1.679781 |
| 22               | 6                | 0              | 3.806361                | -0.948231 | 0.404084  |
| 23               | 8                | 0              | 4.989922                | -1.559119 | 0.714158  |
| 24               | 1                | 0              | 5.020323                | -1.719653 | 1.666382  |
| 25               | 6                | 0              | 2.851590                | -0.617842 | 1.374590  |
| 26               | 1                | 0              | 3.038973                | -0.850386 | 2.421220  |
| 27               | 6                | 0              | 1.663474                | -0.000399 | 0.996599  |
| 28               | 1                | 0              | 0.920961                | 0.246437  | 1.749564  |
| 29               | 8                | 0              | -0.054081               | 2.254848  | -0.045081 |
| 30               | 6                | 0              | 0.848991                | 3.268825  | -0.455953 |
| 31               | 1                | 0              | 0.628254                | 4.155872  | 0.141972  |
| 32               | 1                | 0              | 1.890398                | 2.970469  | -0.286562 |
| 33               | 1                | 0              | 0.718975                | 3.511722  | -1.520639 |
| 34               | 1                | 0              | -1.785062               | 2.343449  | 0.734639  |

Zero-point correction= 0.277545  
 Thermal correction to Energy= 0.295545  
 Thermal correction to Enthalpy= 0.296489  
 Thermal correction to Gibbs Free Energy= 0.229460  
 Sum of electronic and zero-point Energies= -839.923861  
 Sum of electronic and thermal Energies= -839.905861

Sum of electronic and thermal Enthalpies= -839.904917  
 Sum of electronic and thermal Free Energies= -839.971946

TS3:

| Center<br>Number | Atomic<br>Number | Atomic<br>Type | Coordinates (Angstroms) |           |           |
|------------------|------------------|----------------|-------------------------|-----------|-----------|
|                  |                  |                | X                       | Y         | Z         |
| 1                | 7                | 0              | 1.279019                | -1.390967 | 0.294123  |
| 2                | 6                | 0              | 2.567694                | -1.561804 | 0.133885  |
| 3                | 6                | 0              | 3.266726                | -2.877901 | 0.067064  |
| 4                | 1                | 0              | 2.517286                | -3.667568 | 0.137285  |
| 5                | 1                | 0              | 3.983887                | -3.007868 | 0.887552  |
| 6                | 1                | 0              | 3.819938                | -3.007480 | -0.871849 |
| 7                | 7                | 0              | 3.255071                | -0.344666 | 0.052248  |
| 8                | 6                | 0              | 4.661826                | -0.116881 | -0.213930 |
| 9                | 1                | 0              | 5.286464                | -0.448545 | 0.622122  |
| 10               | 1                | 0              | 4.978711                | -0.639959 | -1.121322 |
| 11               | 1                | 0              | 4.797162                | 0.956679  | -0.356282 |
| 12               | 6                | 0              | 2.312255                | 0.649131  | 0.182565  |
| 13               | 8                | 0              | 2.500949                | 1.917600  | -0.013347 |
| 14               | 6                | 0              | 1.092647                | -0.013339 | 0.370781  |
| 15               | 6                | 0              | -0.112497               | 0.749886  | 0.527138  |
| 16               | 1                | 0              | -0.090287               | 1.506465  | 1.313263  |
| 17               | 6                | 0              | -1.445603               | 0.184824  | 0.308080  |
| 18               | 6                | 0              | -2.558663               | 0.743943  | 0.964091  |
| 19               | 1                | 0              | -2.409550               | 1.576972  | 1.645903  |
| 20               | 6                | 0              | -3.839804               | 0.246534  | 0.771765  |
| 21               | 1                | 0              | -4.697472               | 0.671147  | 1.281934  |
| 22               | 6                | 0              | -4.032942               | -0.832408 | -0.099913 |
| 23               | 8                | 0              | -5.306192               | -1.286663 | -0.260849 |
| 24               | 1                | 0              | -5.303489               | -2.031335 | -0.877161 |
| 25               | 6                | 0              | -2.938563               | -1.401836 | -0.765831 |
| 26               | 1                | 0              | -3.092972               | -2.241498 | -1.440195 |
| 27               | 6                | 0              | -1.661064               | -0.896658 | -0.565098 |
| 28               | 1                | 0              | -0.812992               | -1.347835 | -1.065048 |
| 29               | 8                | 0              | 0.200191                | 2.093610  | -0.744052 |
| 30               | 6                | 0              | -0.503174               | 3.291480  | -0.475266 |
| 31               | 1                | 0              | -0.145037               | 4.078735  | -1.149435 |
| 32               | 1                | 0              | -1.573970               | 3.141631  | -0.651914 |
| 33               | 1                | 0              | -0.362677               | 3.639812  | 0.560419  |
| 34               | 1                | 0              | 1.353759                | 2.183861  | -0.425881 |

Zero-point correction= 0.272030  
 Thermal correction to Energy= 0.289643  
 Thermal correction to Enthalpy= 0.290587  
 Thermal correction to Gibbs Free Energy= 0.226337  
 Sum of electronic and zero-point Energies= -839.896512  
 Sum of electronic and thermal Energies= -839.878898

Sum of electronic and thermal Enthalpies= -839.877954  
 Sum of electronic and thermal Free Energies= -839.942204

in Benzene:

n-propylamine

| Center<br>Number | Atomic<br>Number | Atomic<br>Type | Coordinates (Angstroms) |           |           |
|------------------|------------------|----------------|-------------------------|-----------|-----------|
|                  |                  |                | X                       | Y         | Z         |
| 1                | 7                | 0              | 1.897771                | -0.178747 | -0.093893 |
| 2                | 1                | 0              | 2.647180                | 0.509125  | -0.075723 |
| 3                | 1                | 0              | 2.048077                | -0.776315 | 0.716979  |
| 4                | 6                | 0              | 0.599425                | 0.493660  | 0.029201  |
| 5                | 1                | 0              | 0.512059                | 1.204509  | -0.802759 |
| 6                | 6                | 0              | -0.544607               | -0.518187 | -0.055854 |
| 7                | 1                | 0              | 0.485341                | 1.086373  | 0.956192  |
| 8                | 6                | 0              | -1.927988               | 0.132802  | 0.021582  |
| 9                | 1                | 0              | -0.437680               | -1.082780 | -0.989171 |
| 10               | 1                | 0              | -0.437245               | -1.248236 | 0.759283  |
| 11               | 1                | 0              | -2.723944               | -0.616303 | -0.034421 |
| 12               | 1                | 0              | -2.058630               | 0.685379  | 0.959103  |
| 13               | 1                | 0              | -2.080533               | 0.839829  | -0.801802 |

Zero-point correction= 0.121608  
 Thermal correction to Energy= 0.127246  
 Thermal correction to Enthalpy= 0.128190  
 Thermal correction to Gibbs Free Energy= 0.093767  
 Sum of electronic and zero-point Energies= -174.378287  
 Sum of electronic and thermal Energies= -174.372648  
 Sum of electronic and thermal Enthalpies= -174.371704  
 Sum of electronic and thermal Free Energies= -174.406127

TS1

| Center<br>Number | Atomic<br>Number | Atomic<br>Type | Coordinates (Angstroms) |           |           |
|------------------|------------------|----------------|-------------------------|-----------|-----------|
|                  |                  |                | X                       | Y         | Z         |
| 1                | 6                | 0              | 1.939144                | -0.093184 | 0.736645  |
| 2                | 6                | 0              | 1.476549                | -0.289134 | -0.591530 |
| 3                | 6                | 0              | 0.137110                | -0.023496 | -1.033724 |
| 4                | 7                | 0              | -0.131968               | 1.687783  | -0.414495 |
| 5                | 7                | 0              | 3.318590                | -0.318118 | 0.634047  |
| 6                | 6                | 0              | 4.227079                | -0.208069 | 1.753314  |
| 7                | 1                | 0              | 4.990806                | 0.558842  | 1.581080  |
| 8                | 1                | 0              | 3.624696                | 0.077827  | 2.618654  |
| 9                | 1                | 0              | 4.728991                | -1.159307 | 1.963611  |

|    |   |   |           |           |           |
|----|---|---|-----------|-----------|-----------|
| 10 | 6 | 0 | 3.610853  | -0.565697 | -0.707445 |
| 11 | 6 | 0 | 4.993630  | -0.862419 | -1.185097 |
| 12 | 1 | 0 | 5.697412  | -0.051795 | -0.954758 |
| 13 | 1 | 0 | 4.962061  | -0.995617 | -2.267775 |
| 14 | 1 | 0 | 5.399845  | -1.778492 | -0.736511 |
| 15 | 7 | 0 | 2.544382  | -0.519346 | -1.462624 |
| 16 | 1 | 0 | 0.095215  | 0.110786  | -2.116355 |
| 17 | 6 | 0 | -1.067612 | -0.752360 | -0.534679 |
| 18 | 6 | 0 | -1.226818 | -1.146786 | 0.809446  |
| 19 | 1 | 0 | -0.456074 | -0.882786 | 1.528652  |
| 20 | 6 | 0 | -2.355049 | -1.847315 | 1.214544  |
| 21 | 1 | 0 | -2.481584 | -2.153172 | 2.247902  |
| 22 | 6 | 0 | -2.079493 | -1.085716 | -1.446269 |
| 23 | 1 | 0 | -1.975821 | -0.801421 | -2.490594 |
| 24 | 6 | 0 | -3.210850 | -1.797531 | -1.049402 |
| 25 | 1 | 0 | -3.977067 | -2.056926 | -1.777006 |
| 26 | 6 | 0 | -3.351681 | -2.180324 | 0.286981  |
| 27 | 8 | 0 | -4.433409 | -2.874643 | 0.747946  |
| 28 | 1 | 0 | -5.030781 | -3.056961 | 0.010593  |
| 29 | 1 | 0 | 0.604673  | 2.224986  | -0.869769 |
| 30 | 1 | 0 | 0.175952  | 1.509695  | 0.559023  |
| 31 | 6 | 0 | -1.446221 | 2.354624  | -0.485238 |
| 32 | 1 | 0 | -1.698890 | 2.486887  | -1.543372 |
| 33 | 1 | 0 | -2.176942 | 1.660747  | -0.060678 |
| 34 | 6 | 0 | -1.485901 | 3.697620  | 0.252293  |
| 35 | 1 | 0 | -0.733494 | 4.372442  | -0.176729 |
| 36 | 1 | 0 | -1.201306 | 3.538742  | 1.299999  |
| 37 | 6 | 0 | -2.869198 | 4.352828  | 0.182229  |
| 38 | 1 | 0 | -3.633842 | 3.713091  | 0.635479  |
| 39 | 1 | 0 | -3.167000 | 4.546277  | -0.854156 |
| 40 | 1 | 0 | -2.876543 | 5.308504  | 0.714018  |
| 41 | 8 | 0 | 1.341336  | 0.319290  | 1.774277  |

-----

|                                              |             |
|----------------------------------------------|-------------|
| Zero-point correction=                       | 0.346490    |
| Thermal correction to Energy=                | 0.366789    |
| Thermal correction to Enthalpy=              | 0.367733    |
| Thermal correction to Gibbs Free Energy=     | 0.296544    |
| Sum of electronic and zero-point Energies=   | -898.605650 |
| Sum of electronic and thermal Energies=      | -898.585351 |
| Sum of electronic and thermal Enthalpies=    | -898.584407 |
| Sum of electronic and thermal Free Energies= | -898.655596 |

IM1

-----

| Center<br>Number | Atomic<br>Number | Atomic<br>Type | Coordinates (Angstroms) |           |           |
|------------------|------------------|----------------|-------------------------|-----------|-----------|
|                  |                  |                | X                       | Y         | Z         |
| 1                | 7                | 0              | 2.222634                | -0.614231 | -1.371213 |
| 2                | 6                | 0              | 1.359883                | 0.133975  | -0.592519 |

|    |   |   |           |           |           |
|----|---|---|-----------|-----------|-----------|
| 3  | 6 | 0 | -0.077441 | 0.430324  | -0.927253 |
| 4  | 6 | 0 | -1.041748 | -0.648325 | -0.442211 |
| 5  | 6 | 0 | 2.004256  | 0.528577  | 0.555191  |
| 6  | 8 | 0 | 1.591104  | 1.265390  | 1.613017  |
| 7  | 7 | 0 | -0.387406 | 1.750464  | -0.298281 |
| 8  | 1 | 0 | 0.721197  | 1.623789  | 1.305338  |
| 9  | 1 | 0 | 0.256248  | 2.419867  | -0.721402 |
| 10 | 6 | 0 | -1.756167 | 2.244557  | -0.503756 |
| 11 | 1 | 0 | -2.447043 | 1.541660  | -0.028287 |
| 12 | 1 | 0 | -2.021602 | 2.270248  | -1.575863 |
| 13 | 6 | 0 | -1.933086 | 3.637080  | 0.103040  |
| 14 | 1 | 0 | -1.213516 | 4.329392  | -0.356719 |
| 15 | 1 | 0 | -1.680060 | 3.592138  | 1.169348  |
| 16 | 6 | 0 | -3.352143 | 4.183604  | -0.078080 |
| 17 | 1 | 0 | -3.451577 | 5.180049  | 0.362925  |
| 18 | 1 | 0 | -3.617221 | 4.261379  | -1.138351 |
| 19 | 1 | 0 | -4.091449 | 3.532465  | 0.401101  |
| 20 | 6 | 0 | -1.850086 | -1.337781 | -1.347731 |
| 21 | 1 | 0 | -1.793704 | -1.097090 | -2.406161 |
| 22 | 6 | 0 | -2.725949 | -2.339759 | -0.924067 |
| 23 | 1 | 0 | -3.342305 | -2.868898 | -1.648205 |
| 24 | 6 | 0 | -2.807833 | -2.660019 | 0.432155  |
| 25 | 8 | 0 | -3.646127 | -3.626163 | 0.918022  |
| 26 | 1 | 0 | -4.126242 | -4.023970 | 0.180007  |
| 27 | 6 | 0 | -2.005951 | -1.977747 | 1.356028  |
| 28 | 1 | 0 | -2.076618 | -2.241666 | 2.406132  |
| 29 | 6 | 0 | -1.132297 | -0.990586 | 0.916967  |
| 30 | 1 | 0 | -0.503993 | -0.479584 | 1.640033  |
| 31 | 1 | 0 | -0.178161 | 0.485584  | -2.023261 |
| 32 | 6 | 0 | 3.358539  | -0.670668 | -0.710035 |
| 33 | 6 | 0 | 4.595670  | -1.374970 | -1.157483 |
| 34 | 1 | 0 | 5.446203  | -0.691975 | -1.280436 |
| 35 | 1 | 0 | 4.390025  | -1.841593 | -2.121927 |
| 36 | 1 | 0 | 4.906132  | -2.158946 | -0.455077 |
| 37 | 7 | 0 | 3.282480  | 0.024071  | 0.488914  |
| 38 | 6 | 0 | 4.315749  | 0.202368  | 1.492419  |
| 39 | 1 | 0 | 5.220774  | 0.626422  | 1.047058  |
| 40 | 1 | 0 | 3.939690  | 0.889281  | 2.251203  |
| 41 | 1 | 0 | 4.571086  | -0.748275 | 1.972305  |

---

|                                              |             |
|----------------------------------------------|-------------|
| Zero-point correction=                       | 0.348069    |
| Thermal correction to Energy=                | 0.368533    |
| Thermal correction to Enthalpy=              | 0.369477    |
| Thermal correction to Gibbs Free Energy=     | 0.297661    |
| Sum of electronic and zero-point Energies=   | -898.630017 |
| Sum of electronic and thermal Energies=      | -898.609553 |
| Sum of electronic and thermal Enthalpies=    | -898.608609 |
| Sum of electronic and thermal Free Energies= | -898.680425 |

TS2

| Center<br>Number       | Atomic<br>Number | Atomic<br>Type | Coordinates (Angstroms) |           |           |
|------------------------|------------------|----------------|-------------------------|-----------|-----------|
|                        |                  |                | X                       | Y         | Z         |
| 1                      | 7                | 0              | -1.898967               | -1.433011 | 0.738660  |
| 2                      | 6                | 0              | -1.353509               | -0.169773 | 0.575301  |
| 3                      | 6                | 0              | 0.004813                | 0.227212  | 1.089665  |
| 4                      | 6                | 0              | 1.142453                | -0.627589 | 0.542863  |
| 5                      | 6                | 0              | -2.262459               | 0.638747  | -0.066359 |
| 6                      | 8                | 0              | -2.217348               | 1.936473  | -0.424694 |
| 7                      | 7                | 0              | 0.175475                | 1.721057  | 0.848792  |
| 8                      | 1                | 0              | -1.334693               | 2.205363  | -0.041228 |
| 9                      | 1                | 0              | 0.157761                | 2.177957  | 1.757141  |
| 10                     | 6                | 0              | 1.377309                | 2.187077  | 0.135768  |
| 11                     | 1                | 0              | 1.379930                | 1.740083  | -0.863126 |
| 12                     | 1                | 0              | 2.308894                | 1.860484  | 0.622679  |
| 13                     | 6                | 0              | 1.367919                | 3.712704  | 0.017252  |
| 14                     | 1                | 0              | 1.315556                | 4.155702  | 1.022327  |
| 15                     | 1                | 0              | 0.456976                | 4.029322  | -0.505945 |
| 16                     | 6                | 0              | 2.602393                | 4.251496  | -0.711845 |
| 17                     | 1                | 0              | 2.573933                | 5.342961  | -0.783081 |
| 18                     | 1                | 0              | 3.525449                | 3.975430  | -0.190326 |
| 19                     | 1                | 0              | 2.666056                | 3.853177  | -1.730343 |
| 20                     | 6                | 0              | 2.238483                | -0.943161 | 1.351958  |
| 21                     | 1                | 0              | 2.259493                | -0.599696 | 2.383729  |
| 22                     | 6                | 0              | 3.306121                | -1.700195 | 0.869366  |
| 23                     | 1                | 0              | 4.145206                | -1.940226 | 1.519434  |
| 24                     | 6                | 0              | 3.287833                | -2.160170 | -0.450307 |
| 25                     | 8                | 0              | 4.298397                | -2.908445 | -0.988118 |
| 26                     | 1                | 0              | 4.972735                | -3.058133 | -0.312614 |
| 27                     | 6                | 0              | 2.196155                | -1.861817 | -1.273442 |
| 28                     | 1                | 0              | 2.190065                | -2.236757 | -2.291596 |
| 29                     | 6                | 0              | 1.139441                | -1.108546 | -0.774207 |
| 30                     | 1                | 0              | 0.283945                | -0.899806 | -1.409000 |
| 31                     | 1                | 0              | 0.018748                | 0.083270  | 2.179347  |
| 32                     | 6                | 0              | -3.098869               | -1.389217 | 0.204905  |
| 33                     | 6                | 0              | -4.064879               | -2.524594 | 0.133619  |
| 34                     | 1                | 0              | -5.007326               | -2.305950 | 0.652133  |
| 35                     | 1                | 0              | -3.604726               | -3.391430 | 0.610157  |
| 36                     | 1                | 0              | -4.317587               | -2.794361 | -0.900004 |
| 37                     | 7                | 0              | -3.379394               | -0.131281 | -0.307910 |
| 38                     | 6                | 0              | -4.587744               | 0.322611  | -0.969556 |
| 39                     | 1                | 0              | -5.460519               | 0.197934  | -0.320658 |
| 40                     | 1                | 0              | -4.470271               | 1.381438  | -1.202359 |
| 41                     | 1                | 0              | -4.760579               | -0.227045 | -1.900844 |
| Zero-point correction= |                  |                | 0.347388                |           |           |



Thermal correction to Energy= 0.367133  
 Thermal correction to Enthalpy= 0.368078  
 Thermal correction to Gibbs Free Energy= 0.298285  
 Sum of electronic and zero-point Energies= -898.624275  
 Sum of electronic and thermal Energies= -898.604530  
 Sum of electronic and thermal Enthalpies= -898.603586  
 Sum of electronic and thermal Free Energies= -898.673378

IM2

| Center<br>Number | Atomic<br>Number | Atomic<br>Type | Coordinates (Angstroms) |           |           |
|------------------|------------------|----------------|-------------------------|-----------|-----------|
|                  |                  |                | X                       | Y         | Z         |
| 1                | 7                | 0              | -1.733121               | -1.439925 | 0.532341  |
| 2                | 6                | 0              | -1.316140               | -0.133027 | 0.345364  |
| 3                | 6                | 0              | 0.069486                | 0.385330  | 0.630587  |
| 4                | 6                | 0              | 1.187276                | -0.602985 | 0.328941  |
| 5                | 6                | 0              | -2.390289               | 0.635628  | -0.042379 |
| 6                | 8                | 0              | -2.502888               | 1.947816  | -0.330440 |
| 7                | 7                | 0              | 0.217949                | 1.681120  | -0.115867 |
| 8                | 1                | 0              | -1.558756               | 2.253484  | -0.264592 |
| 9                | 1                | 0              | 0.394154                | 1.441486  | -1.092567 |
| 10               | 6                | 0              | 1.317524                | 2.535017  | 0.356092  |
| 11               | 1                | 0              | 1.097989                | 2.814097  | 1.394632  |
| 12               | 1                | 0              | 2.278644                | 1.996487  | 0.368692  |
| 13               | 6                | 0              | 1.447249                | 3.796675  | -0.498742 |
| 14               | 1                | 0              | 1.635963                | 3.507292  | -1.541966 |
| 15               | 1                | 0              | 0.489677                | 4.331792  | -0.494885 |
| 16               | 6                | 0              | 2.567932                | 4.722228  | -0.016451 |
| 17               | 1                | 0              | 2.391017                | 5.057271  | 1.011609  |
| 18               | 1                | 0              | 2.642894                | 5.613122  | -0.647161 |
| 19               | 1                | 0              | 3.539564                | 4.216568  | -0.038073 |
| 20               | 1                | 0              | 0.149523                | 0.656980  | 1.693865  |
| 21               | 7                | 0              | -3.478647               | -0.203700 | -0.106815 |
| 22               | 6                | 0              | -4.821358               | 0.183526  | -0.497541 |
| 23               | 1                | 0              | -5.141840               | -0.356604 | -1.394348 |
| 24               | 1                | 0              | -4.818813               | 1.252683  | -0.711553 |
| 25               | 1                | 0              | -5.536525               | -0.014677 | 0.307125  |
| 26               | 6                | 0              | -3.018026               | -1.461204 | 0.256930  |
| 27               | 6                | 0              | -3.902892               | -2.661667 | 0.311700  |
| 28               | 1                | 0              | -4.349762               | -2.898308 | -0.662654 |
| 29               | 1                | 0              | -4.726837               | -2.541369 | 1.026868  |
| 30               | 1                | 0              | -3.298327               | -3.513576 | 0.626336  |
| 31               | 6                | 0              | 1.215071                | -1.321581 | -0.876496 |
| 32               | 1                | 0              | 0.383736                | -1.228189 | -1.569260 |
| 33               | 6                | 0              | 2.268215                | -2.172559 | -1.188760 |
| 34               | 1                | 0              | 2.284831                | -2.733314 | -2.117496 |
| 35               | 6                | 0              | 3.325961                | -2.330578 | -0.284973 |
| 36               | 8                | 0              | 4.336162                | -3.182360 | -0.639199 |

|    |   |   |          |           |          |
|----|---|---|----------|-----------|----------|
| 37 | 1 | 0 | 4.984087 | -3.214927 | 0.076722 |
| 38 | 6 | 0 | 3.313376 | -1.632859 | 0.924737 |
| 39 | 1 | 0 | 4.127810 | -1.758381 | 1.635537 |
| 40 | 6 | 0 | 2.249291 | -0.778651 | 1.219968 |
| 41 | 1 | 0 | 2.245472 | -0.247801 | 2.168812 |

-----

Zero-point correction= 0.347763  
Thermal correction to Energy= 0.368293  
Thermal correction to Enthalpy= 0.369237  
Thermal correction to Gibbs Free Energy= 0.296980  
Sum of electronic and zero-point Energies= -898.631191  
Sum of electronic and thermal Energies= -898.610661  
Sum of electronic and thermal Enthalpies= -898.609717  
Sum of electronic and thermal Free Energies= -898.681973

TS3

-----

| Center<br>Number | Atomic<br>Number | Atomic<br>Type | Coordinates (Angstroms) |           |           |
|------------------|------------------|----------------|-------------------------|-----------|-----------|
|                  |                  |                | X                       | Y         | Z         |
| 1                | 6                | 0              | -2.440969               | 0.479989  | 0.493642  |
| 2                | 6                | 0              | -1.316242               | -0.374871 | 0.385605  |
| 3                | 6                | 0              | 0.001390                | 0.129783  | 0.680307  |
| 4                | 7                | 0              | 0.073343                | 1.647813  | -0.286585 |
| 5                | 1                | 0              | 0.064645                | 0.671220  | 1.629342  |
| 6                | 8                | 0              | -2.503304               | 1.721960  | 0.743107  |
| 7                | 7                | 0              | -3.512503               | -0.337678 | 0.116207  |
| 8                | 6                | 0              | -4.883249               | 0.117793  | 0.057561  |
| 9                | 1                | 0              | -4.873077               | 1.178233  | 0.320023  |
| 10               | 1                | 0              | -5.304212               | 0.001979  | -0.947499 |
| 11               | 1                | 0              | -5.521806               | -0.420300 | 0.767502  |
| 12               | 6                | 0              | -2.990558               | -1.584762 | -0.225252 |
| 13               | 6                | 0              | -3.851469               | -2.722569 | -0.663363 |
| 14               | 1                | 0              | -4.433144               | -2.483952 | -1.563596 |
| 15               | 1                | 0              | -4.568090               | -3.023326 | 0.112189  |
| 16               | 1                | 0              | -3.207827               | -3.575671 | -0.884647 |
| 17               | 7                | 0              | -1.688220               | -1.629088 | -0.097102 |
| 18               | 6                | 0              | 1.230195                | -0.665857 | 0.417019  |
| 19               | 6                | 0              | 1.307856                | -1.602477 | -0.631189 |
| 20               | 1                | 0              | 0.421916                | -1.799638 | -1.222975 |
| 21               | 6                | 0              | 2.368661                | -0.469356 | 1.212615  |
| 22               | 1                | 0              | 2.329005                | 0.237615  | 2.037470  |
| 23               | 6                | 0              | 3.547869                | -1.173771 | 0.980617  |
| 24               | 1                | 0              | 4.416735                | -1.012429 | 1.615179  |
| 25               | 6                | 0              | 3.605824                | -2.096282 | -0.069048 |
| 26               | 8                | 0              | 4.727637                | -2.818252 | -0.355436 |
| 27               | 1                | 0              | 5.418147                | -2.600157 | 0.284477  |
| 28               | 1                | 0              | 2.538896                | -3.038679 | -1.673518 |
| 29               | 1                | 0              | 0.048666                | 1.354492  | -1.262134 |

|    |   |   |           |           |           |
|----|---|---|-----------|-----------|-----------|
| 30 | 1 | 0 | -0.875664 | 2.002107  | -0.007971 |
| 31 | 6 | 0 | 1.147047  | 2.617883  | -0.013246 |
| 32 | 1 | 0 | 2.107027  | 2.129443  | -0.212174 |
| 33 | 1 | 0 | 1.108682  | 2.840936  | 1.058959  |
| 34 | 6 | 0 | 1.014180  | 3.910626  | -0.825106 |
| 35 | 1 | 0 | 0.036820  | 4.364545  | -0.620843 |
| 36 | 1 | 0 | 1.028663  | 3.667138  | -1.895679 |
| 37 | 6 | 0 | 2.131499  | 4.909858  | -0.507749 |
| 38 | 1 | 0 | 2.020424  | 5.822044  | -1.100842 |
| 39 | 1 | 0 | 3.118107  | 4.487387  | -0.727353 |
| 40 | 1 | 0 | 2.118733  | 5.197112  | 0.549192  |
| 41 | 6 | 0 | 2.478690  | -2.308835 | -0.873098 |

-----

Zero-point correction= 0.346459  
Thermal correction to Energy= 0.366700  
Thermal correction to Enthalpy= 0.367645  
Thermal correction to Gibbs Free Energy= 0.296499  
Sum of electronic and zero-point Energies= -898.609425  
Sum of electronic and thermal Energies= -898.589184  
Sum of electronic and thermal Enthalpies= -898.588240  
Sum of electronic and thermal Free Energies= -898.659385

Z-HOBDI

-----

| Center<br>Number | Atomic<br>Number | Atomic<br>Type | Coordinates (Angstroms) |           |           |
|------------------|------------------|----------------|-------------------------|-----------|-----------|
|                  |                  |                | X                       | Y         | Z         |
| 1                | 7                | 0              | -1.290434               | 0.978390  | -0.000008 |
| 2                | 6                | 0              | -2.584120               | 1.129926  | -0.000007 |
| 3                | 6                | 0              | -3.275444               | 2.451234  | -0.000018 |
| 4                | 1                | 0              | -2.524364               | 3.241299  | -0.000039 |
| 5                | 1                | 0              | -3.915005               | 2.566078  | 0.882791  |
| 6                | 1                | 0              | -3.915029               | 2.566051  | -0.882814 |
| 7                | 7                | 0              | -3.296459               | -0.064100 | 0.000004  |
| 8                | 6                | 0              | -4.730991               | -0.265066 | 0.000016  |
| 9                | 1                | 0              | -5.197741               | 0.166547  | 0.891374  |
| 10               | 1                | 0              | -5.197755               | 0.166558  | -0.891329 |
| 11               | 1                | 0              | -4.893601               | -1.344776 | 0.000011  |
| 12               | 6                | 0              | -2.367612               | -1.120527 | 0.000015  |
| 13               | 8                | 0              | -2.645743               | -2.310057 | 0.000028  |
| 14               | 6                | 0              | -1.063062               | -0.406086 | 0.000006  |
| 15               | 6                | 0              | 0.121993                | -1.069812 | 0.000010  |
| 16               | 1                | 0              | 0.020846                | -2.153930 | 0.000021  |
| 17               | 6                | 0              | 1.476300                | -0.555475 | 0.000002  |
| 18               | 6                | 0              | 2.549451                | -1.473701 | 0.000010  |
| 19               | 1                | 0              | 2.331984                | -2.538396 | 0.000021  |
| 20               | 6                | 0              | 3.870444                | -1.052942 | 0.000003  |
| 21               | 1                | 0              | 4.691613                | -1.761499 | 0.000009  |
| 22               | 6                | 0              | 4.155929                | 0.318084  | -0.000011 |

|                                              |   |   |          |             |           |
|----------------------------------------------|---|---|----------|-------------|-----------|
| 23                                           | 8 | 0 | 5.467365 | 0.687089    | -0.000017 |
| 24                                           | 1 | 0 | 5.525810 | 1.651917    | -0.000027 |
| 25                                           | 6 | 0 | 3.108381 | 1.250441    | -0.000019 |
| 26                                           | 1 | 0 | 3.333794 | 2.315165    | -0.000030 |
| 27                                           | 6 | 0 | 1.788368 | 0.822000    | -0.000012 |
| 28                                           | 1 | 0 | 0.976892 | 1.540236    | -0.000018 |
| -----                                        |   |   |          |             |           |
| Zero-point correction=                       |   |   |          | 0.222186    |           |
| Thermal correction to Energy=                |   |   |          | 0.236697    |           |
| Thermal correction to Enthalpy=              |   |   |          | 0.237641    |           |
| Thermal correction to Gibbs Free Energy=     |   |   |          | 0.180264    |           |
| Sum of electronic and zero-point Energies=   |   |   |          | -724.265436 |           |
| Sum of electronic and thermal Energies=      |   |   |          | -724.250925 |           |
| Sum of electronic and thermal Enthalpies=    |   |   |          | -724.249981 |           |
| Sum of electronic and thermal Free Energies= |   |   |          | -724.307358 |           |
